# Supplementary material
Source: Royal Society of Chemistry journal article supplement (doi:10.1039/d6nj00177g)
Supplement: d6nj00177g15.pdf [file d6nj00177g15.pdf]

## **Ginsenoside Rg3-containing ionizable lipid nanoparticles for siRNA delivery**

Yuxin Ren, Hanyu Liu, Jingjing Zhao, Wenxia Xu, Xuefeng Tang,\* Shubin Li,\*  
Xiaojun Han\*

State Key Laboratory of Urban-rural Water Resource and Environment, MIIT Key Laboratory of Critical Materials Technology for New Energy Conversion and Storage, Heilongjiang Provincial Joint Laboratory of Molecular Science (International Cooperation), School of Chemistry and Chemical Engineering, Harbin Institute of Technology, Harbin 150001, China

**Table S1.** Formulation of LNPs with diverse molar ratio of MC3, DSPC, PEG and Rg3  
**L16(4<sup>4</sup>) orthogonal table**

|              | <b>MC3</b> | <b>DSPC</b> | <b>PEG</b> | <b>Rg3</b> |
|--------------|------------|-------------|------------|------------|
| <b>LNP1</b>  | 15         | 10          | 0.5        | 10         |
| <b>LNP2</b>  | 15         | 20          | 1          | 20         |
| <b>LNP3</b>  | 15         | 30          | 2.5        | 30         |
| <b>LNP4</b>  | 15         | 40          | 5          | 40         |
| <b>LNP5</b>  | 25         | 10          | 1          | 30         |
| <b>LNP6</b>  | 25         | 20          | 0.5        | 40         |
| <b>LNP7</b>  | 25         | 30          | 5          | 10         |
| <b>LNP8</b>  | 25         | 40          | 2.5        | 20         |
| <b>LNP9</b>  | 35         | 10          | 2.5        | 40         |
| <b>LNP10</b> | 35         | 20          | 5          | 30         |
| <b>LNP11</b> | 35         | 30          | 0.5        | 20         |
| <b>LNP12</b> | 35         | 40          | 1          | 10         |
| <b>LNP13</b> | 45         | 10          | 5          | 20         |
| <b>LNP14</b> | 45         | 20          | 2.5        | 10         |
| <b>LNP15</b> | 45         | 30          | 1          | 40         |
| <b>LNP16</b> | 45         | 40          | 0.5        | 30         |

**Table S2.** Physical properties of Rg3-LNPs-siRNA and Chol-LNPs-siRNA

|                        | <b>Size (nm)</b> | <b>PDI</b>   | <b>Zeta Potential (mV)</b> |
|------------------------|------------------|--------------|----------------------------|
| <b>Rg3-LNPs-siRNA</b>  | 172 ± 6          | 0.273 ± 0.13 | -0.83 ± 0.10               |
| <b>Chol-LNPs-siRNA</b> | 165 ± 10         | 0.289 ± 0.07 | -0.77 ± 0.22               |

**Table S3.** Physical properties of Rg3-LNPs-siSTAT3 and Chol-LNPs-siSTAT3

|                          | <b>Size (nm)</b> | <b>PDI</b>   | <b>Zeta Potential (mV)</b> |
|--------------------------|------------------|--------------|----------------------------|
| <b>Rg3-LNPs-siSTAT3</b>  | 166 ± 17         | 0.235 ± 0.09 | -0.50 ± 0.17               |
| <b>Chol-LNPs-siSTAT3</b> | 169 ± 8          | 0.242 ± 0.07 | -0.66 ± 0.13               |

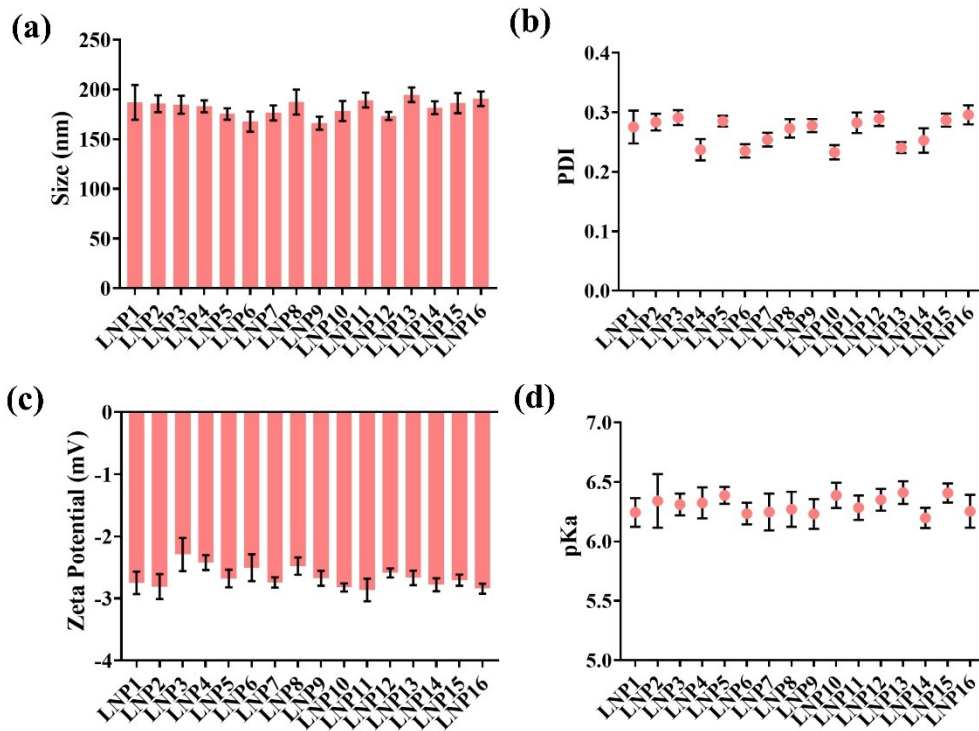

**Fig. S1.** Particle size of sixteen groups of Rg3-LNPs (a), PDI (b), Zeta potential (c) and pKa values (d).

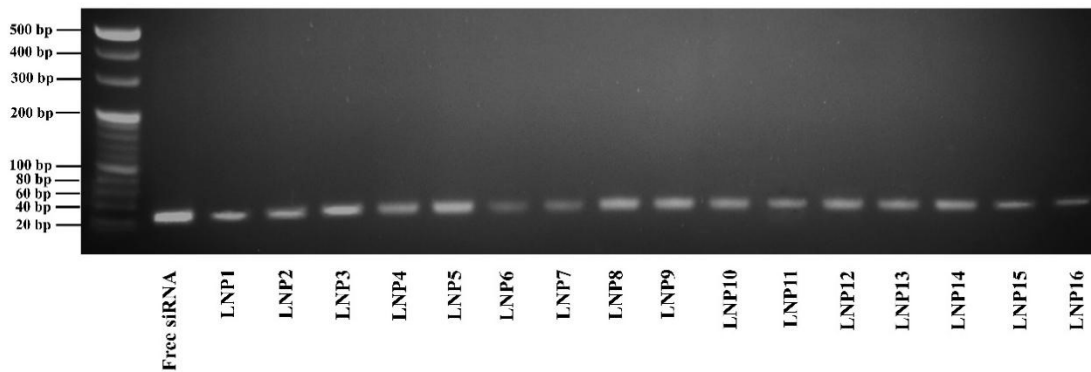

**Fig. S2.** Gel electrophoresis analysis of siRNA loading efficiency for 16 groups of LNPs.

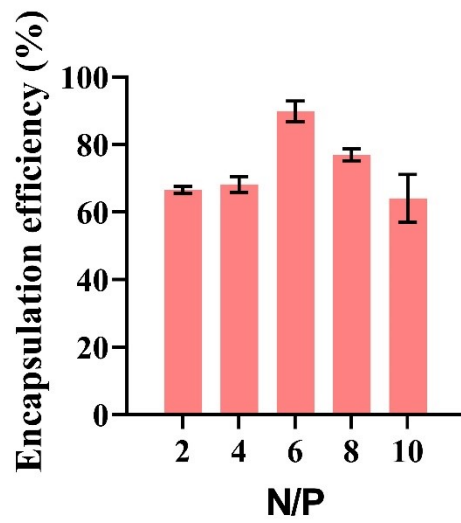

**Fig. S3.** Encapsulation efficiency of LNP6 under different N/P.

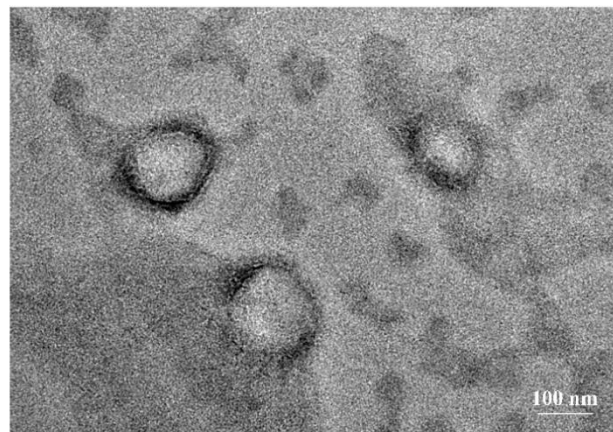

**Fig. S4.** TEM image of Rg3-LNPs-siRNA.

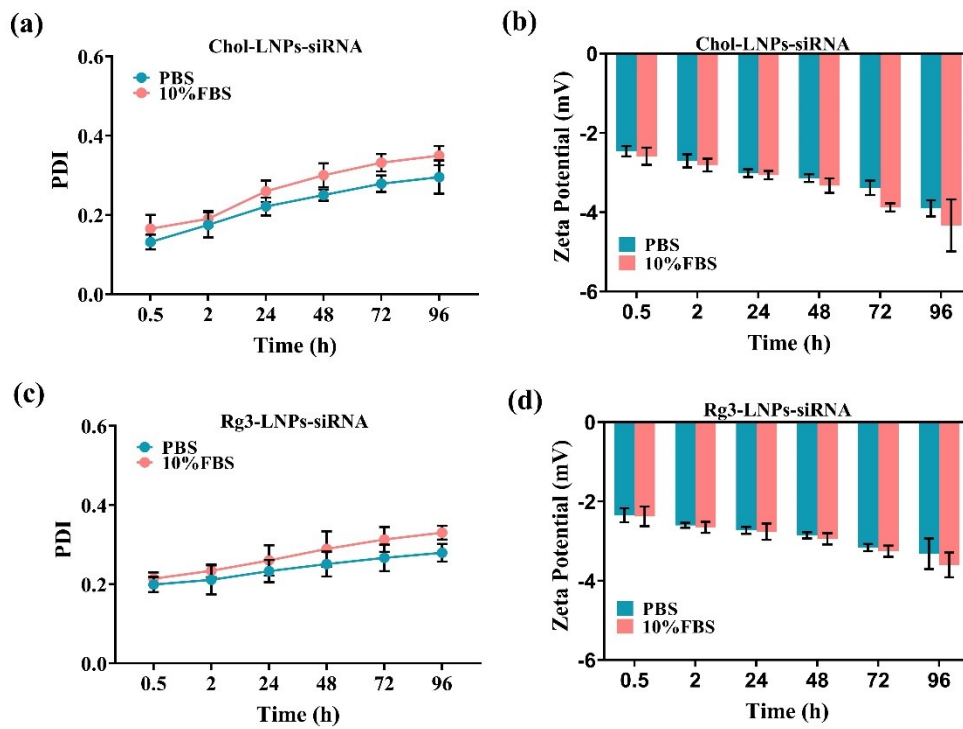

**Fig. S5.** The PDI and Zeta potential of Chol-LNPs-siRNA (a, b) and Rg3-LNPs-siRNA (c, d) in different medium conditions with different incubation time periods characterized by DLS.

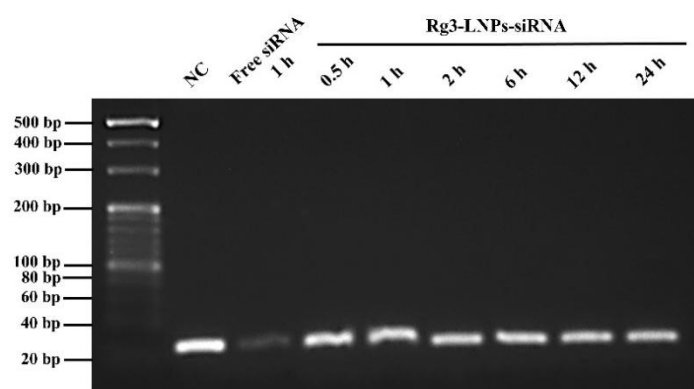

**Fig. S6.** Gel electrophoresis analysis of the RNase stability of siRNA in Rg3-LNPs.

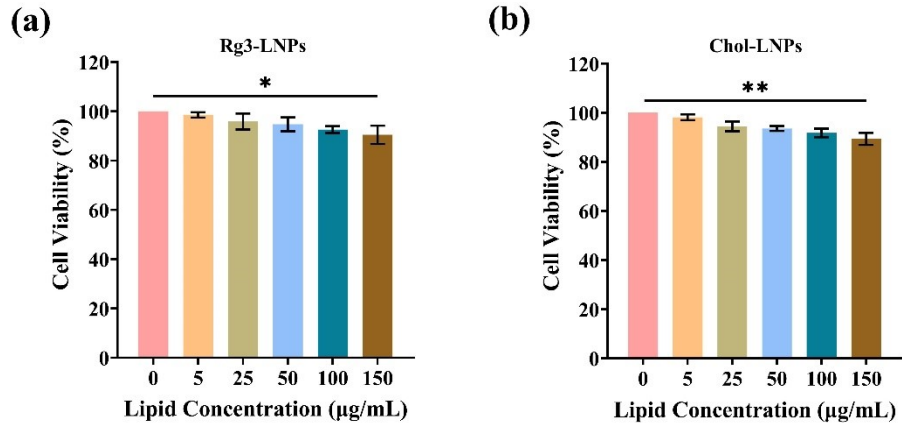

**Fig. S7.** Cell viability of Rg3-LNPs (a) and Chol-LNPs (b) after incubation with different lipid concentration for 24h. Data in a, b are expressed as mean±standard deviation (n=3 biologically independent samples). Statistical significance was analyzed by two-tailed unpaired t test: \*P < 0.05, \*\*P < 0.01.

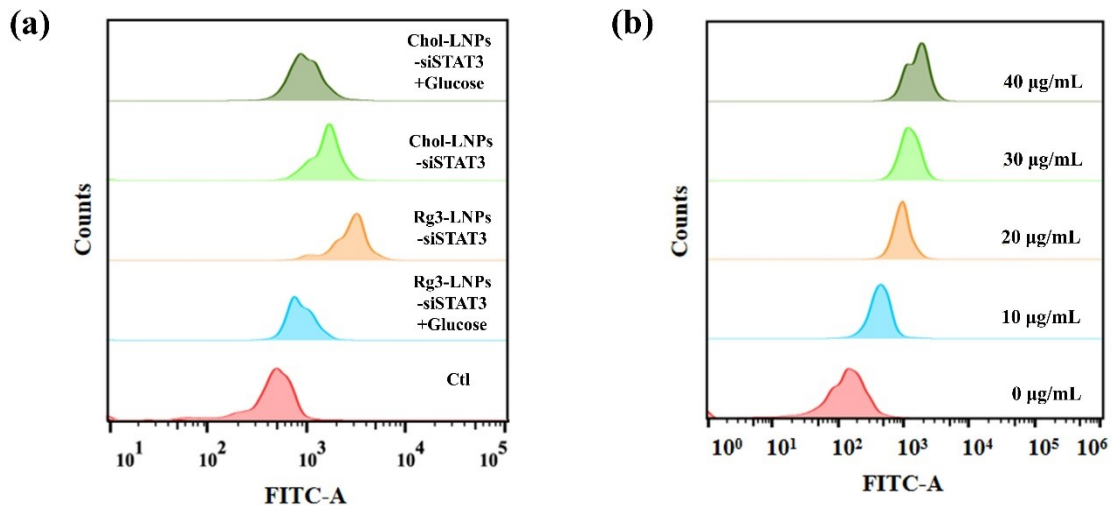

**Fig. S8.** (a) The uptake of Rg3-LNPs-siRNA, Chol-LNPs-siRNA, Rg3-LNPs-siRNA+Glucose, and Chol-LNPs-siRNA+Glucose by 4T1 cells analyzed by flow cytometry. (b) Dose-dependent cellular uptake of FAM-siRNA in 4T1 cells treated with different concentrations of Rg3-LNPs-siRNA detected by flow cytometry.

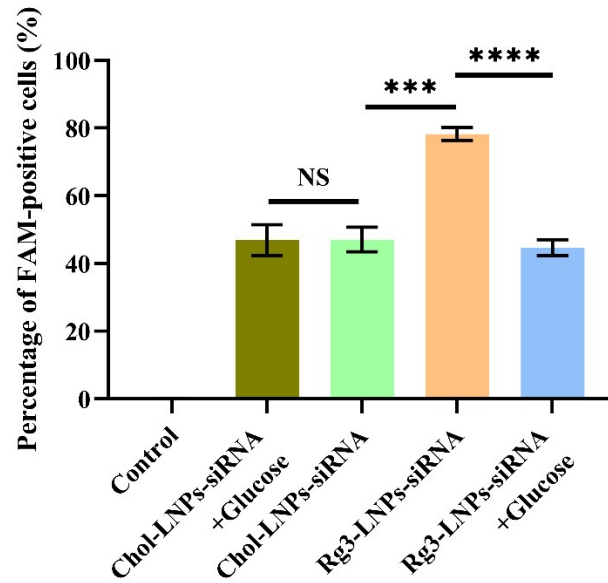

**Fig. S9.** Flow cytometry was used to determine the percentage of FAM-positive cells in total 4T1 cells treated with Rg3-LNPs-siRNA, chol-LNPs-siRNA, Rg3-LNPs-siRNA+Glucose, and chol-LNPs-siRNA+Glucose. Data are expressed as mean±standard deviation (n=3 biologically independent samples). Statistical significance was analyzed by two-tailed unpaired t test: ns, not significant, \*\*\*P < 0.001, \*\*\*\*p < 0.0001.

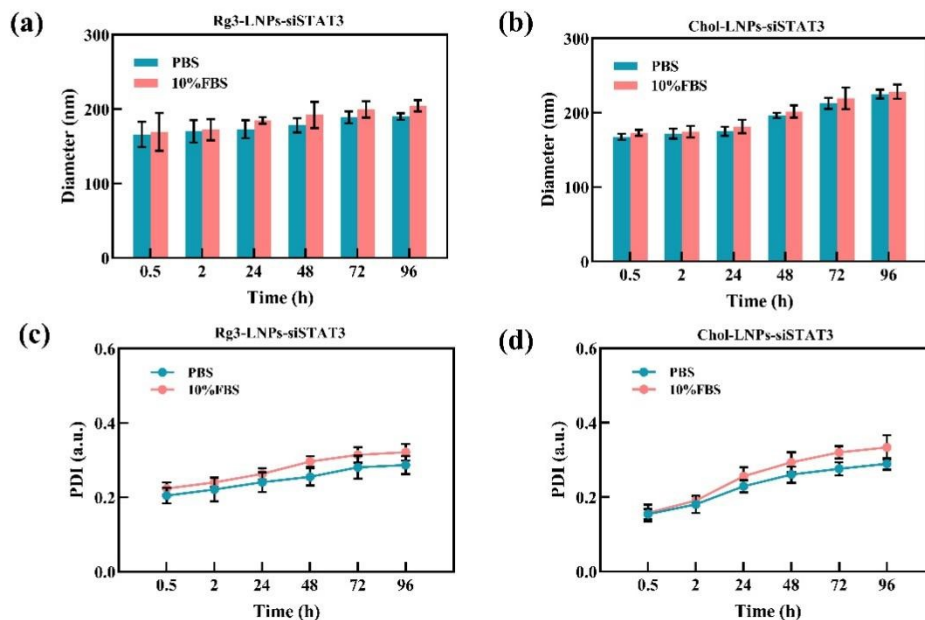

**Fig. S10.** The Diameter (a, b) and PDI (c, d) of Chol-LNPs-siSTAT3 and Rg3-LNPs-siSTAT3 in different medium conditions with different incubation time periods characterized by DLS.

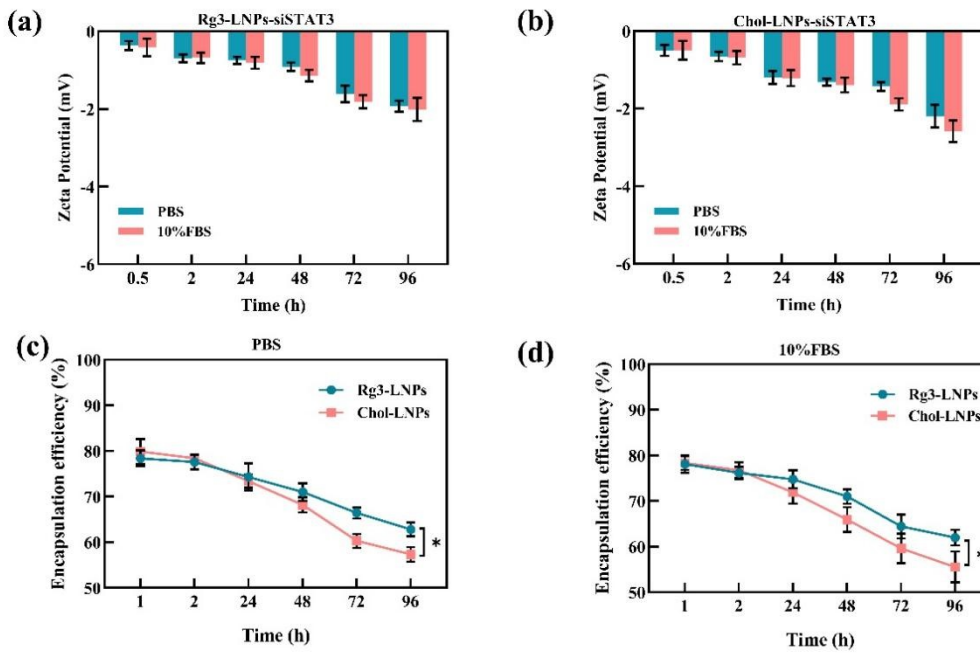

**Fig. S11.** The Zeta potential (a, b) and EE (c, d) of Chol-LNPs-si STAT3 and Rg3-LNPs-siSTAT3 in different medium conditions with different incubation time periods characterized by DLS. Data in c, d are expressed as mean  $\pm$  standard deviation ( $n=3$  biologically independent samples). Statistical significance was analyzed by two-tailed unpaired t test: \* $P < 0.05$ .

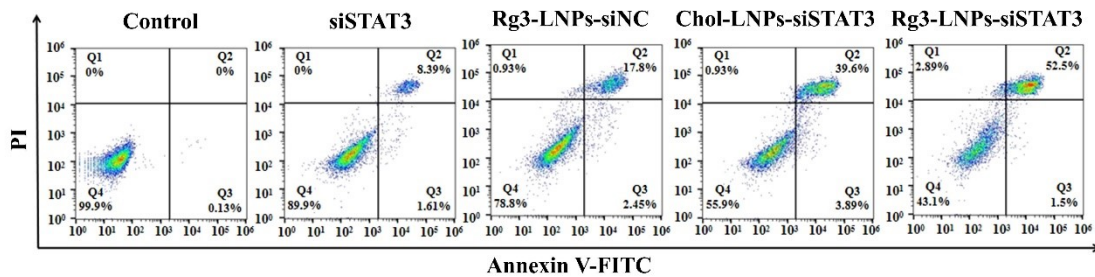

**Fig. S12.** Flow cytometric analysis of apoptosis in 4T1 cells after 48 h of incubation with PBS, siSTAT3, Rg3-LNPs-siNC, Chol-LNPs-siSTAT3 and Rg3-LNPs-siSTAT3.

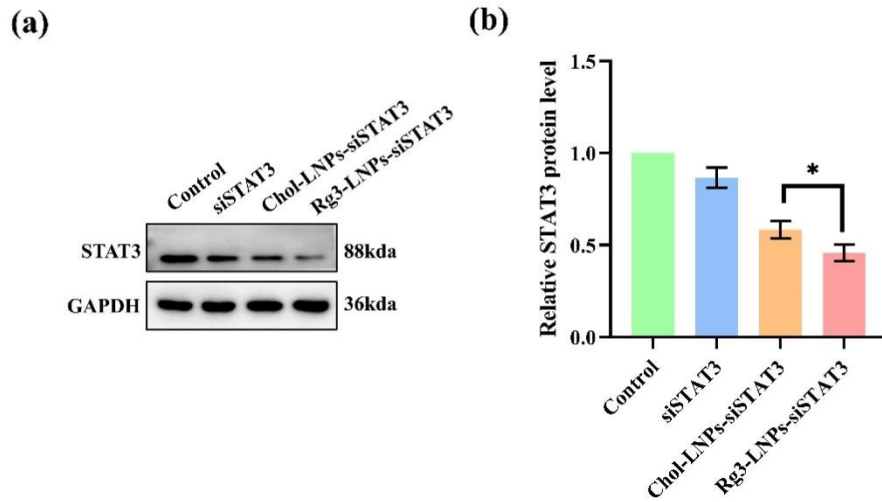

**Fig. S13.** (a) Western blot analysis of STAT3 proteins. (b) Quantitative analysis of the Western blot. Data are expressed as mean  $\pm$  standard deviation (n=3 biologically independent samples). Statistical significance was analyzed by two-tailed unpaired t test: \*P < 0.05.
