# Supplementary material
Source: Royal Society of Chemistry journal article supplement (doi:10.1039/d6nj00177g)

**(a)**

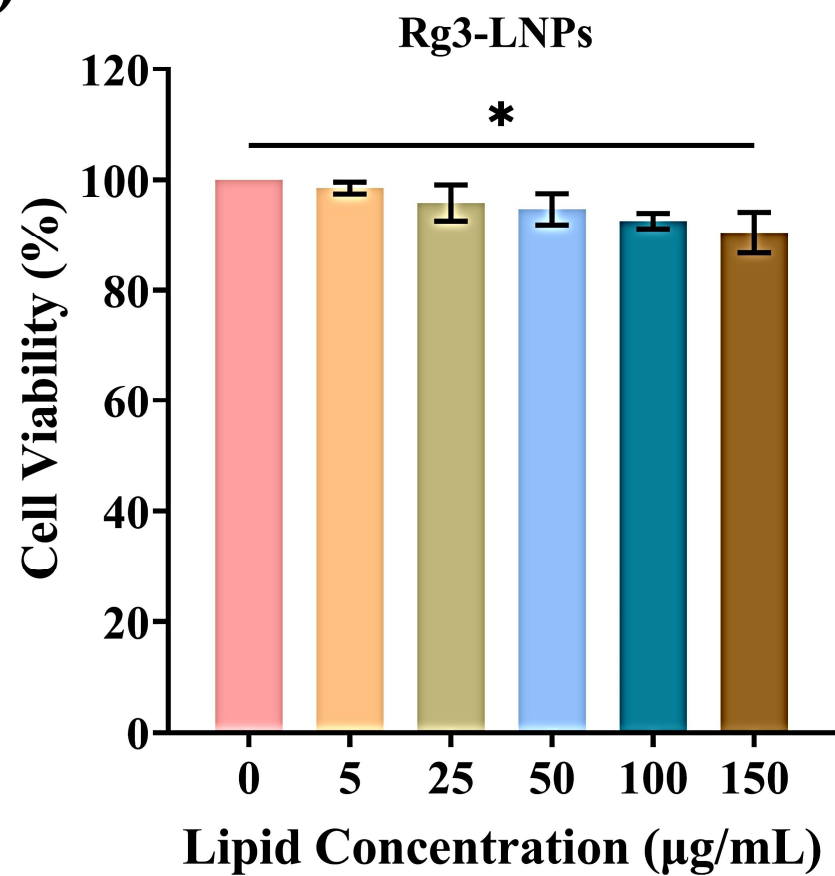

**(b)**

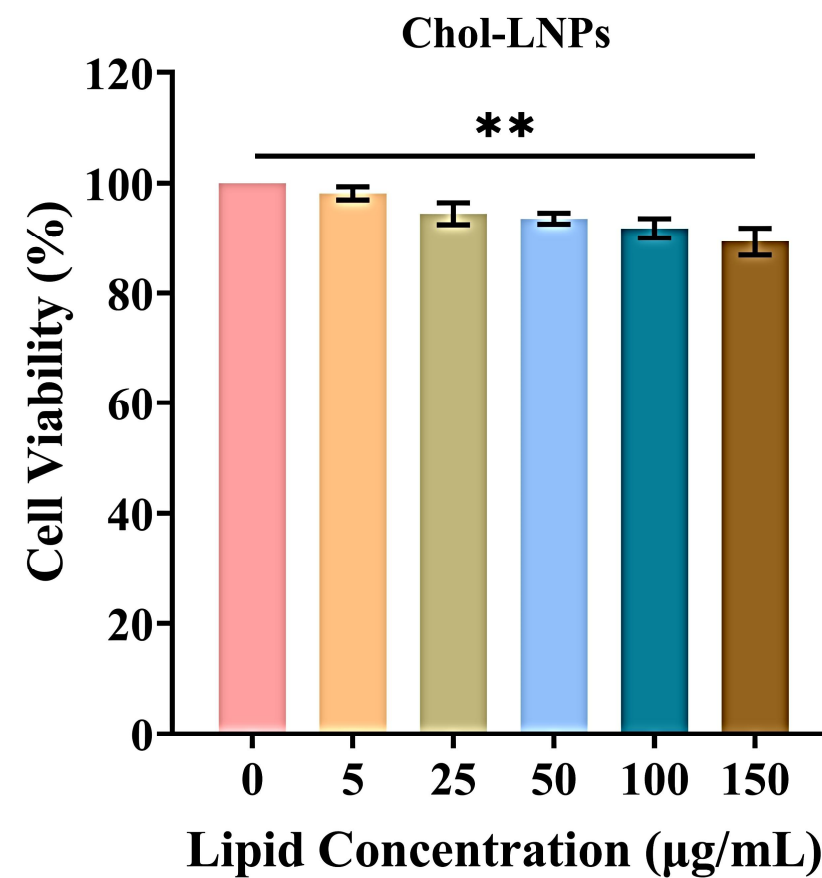

Supplement: d6nj00177g10.pdf [file d6nj00177g10.pdf]

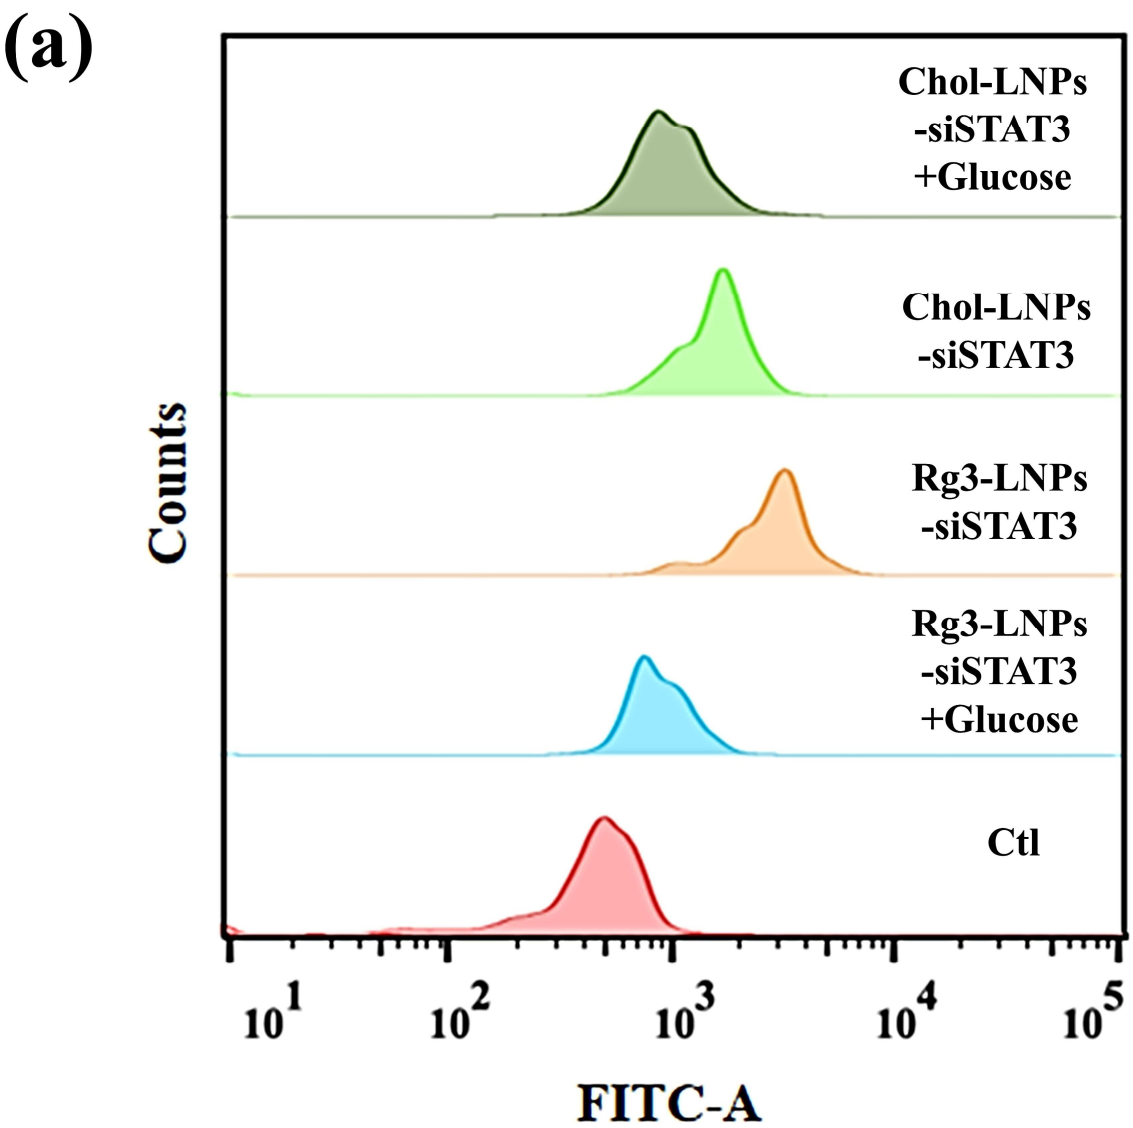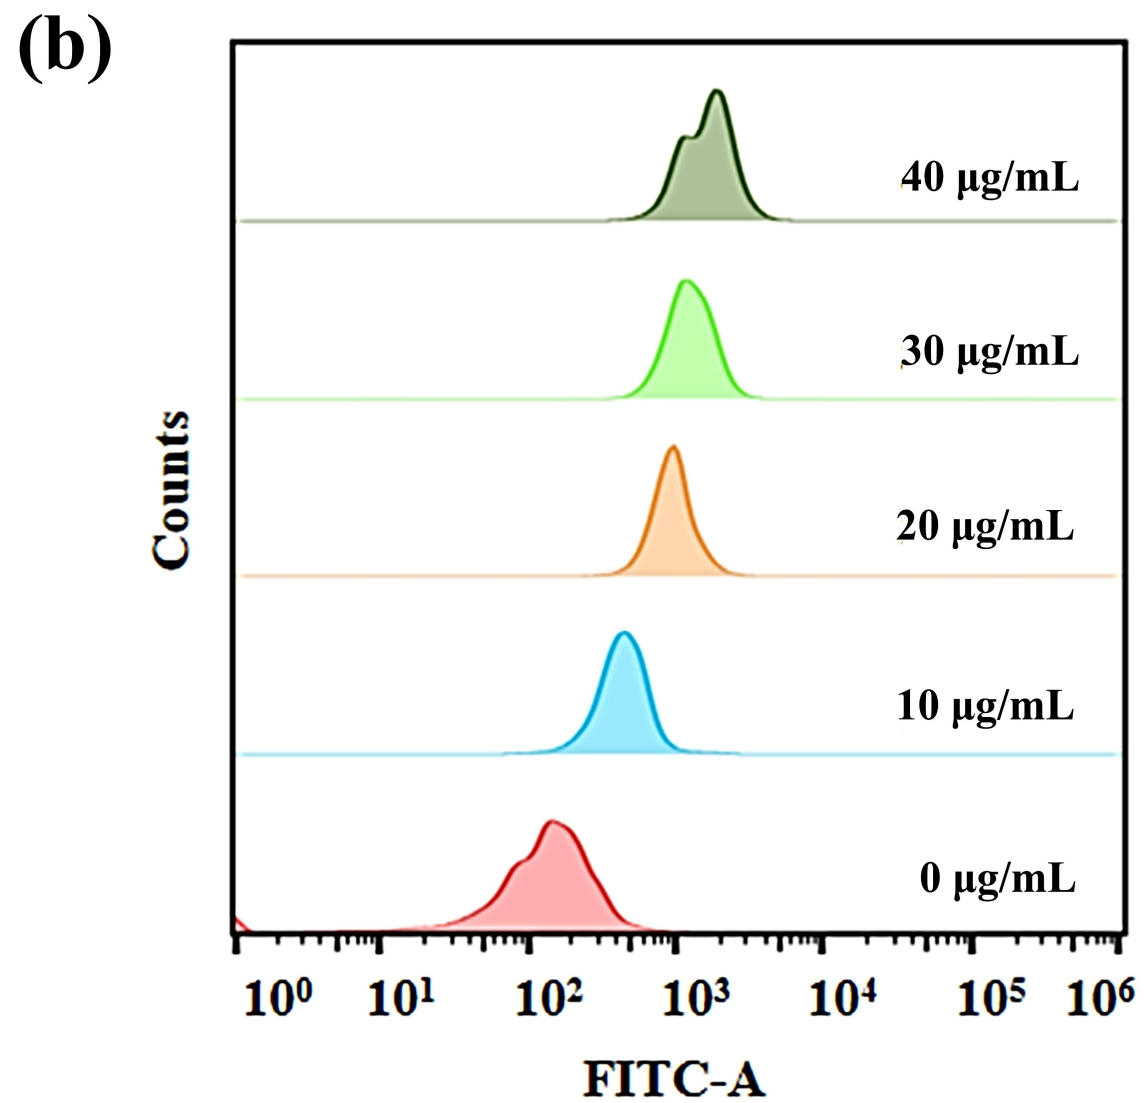

Supplement: d6nj00177g11.pdf [file d6nj00177g11.pdf]

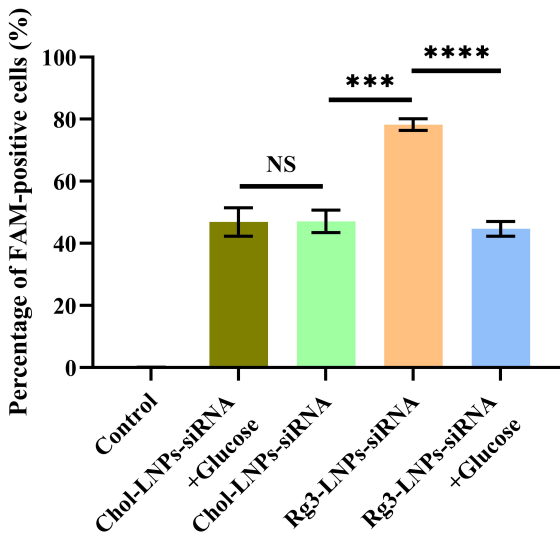

Supplement: d6nj00177g12.pdf [file d6nj00177g12.pdf]

(a)

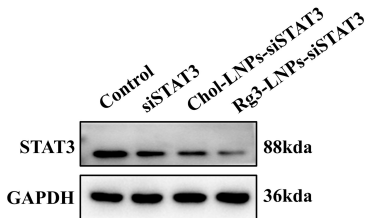

(b)

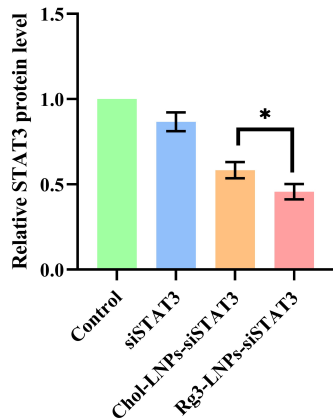

Supplement: d6nj00177g14.pdf [file d6nj00177g14.pdf]

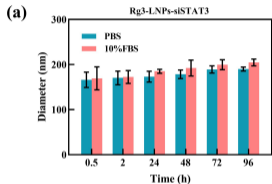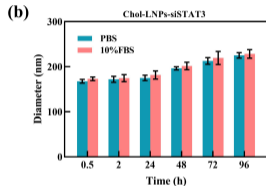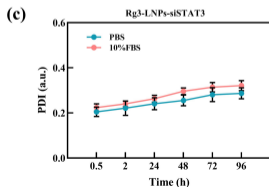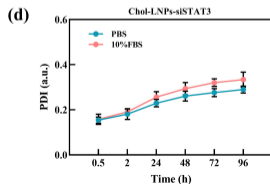

Supplement: d6nj00177g2.pdf [file d6nj00177g2.pdf]

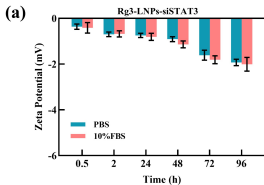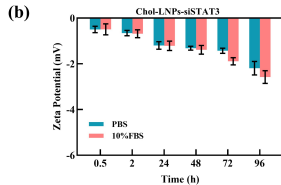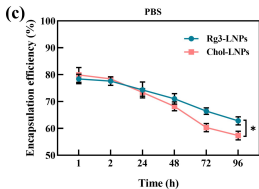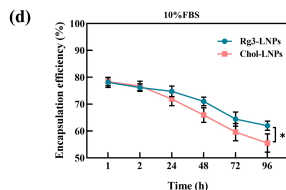

Supplement: d6nj00177g3.pdf [file d6nj00177g3.pdf]

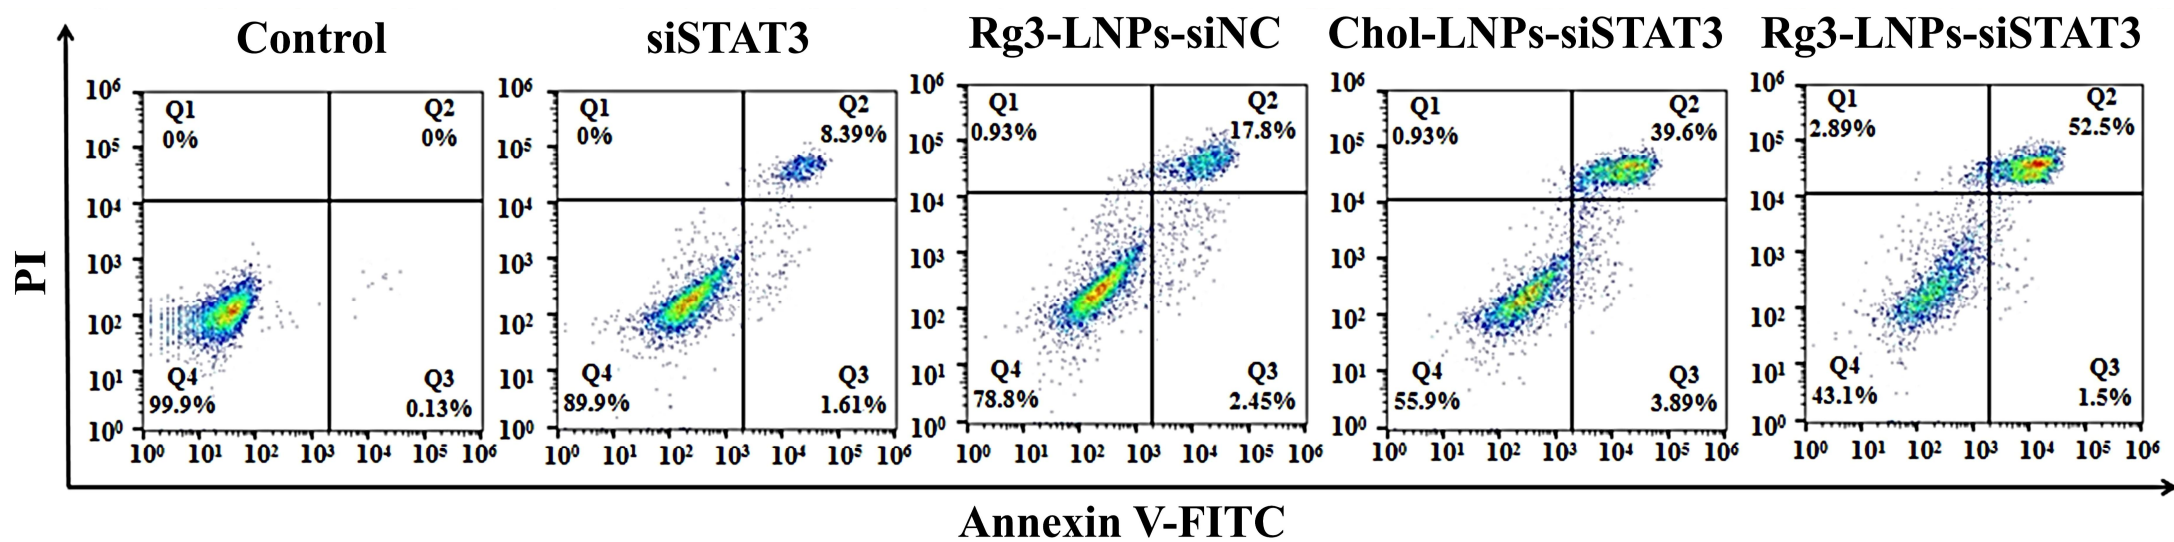

Supplement: d6nj00177g4.pdf [file d6nj00177g4.pdf]

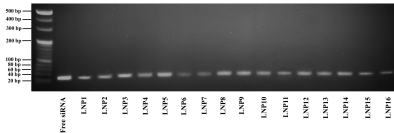

Supplement: d6nj00177g5.pdf [file d6nj00177g5.pdf]

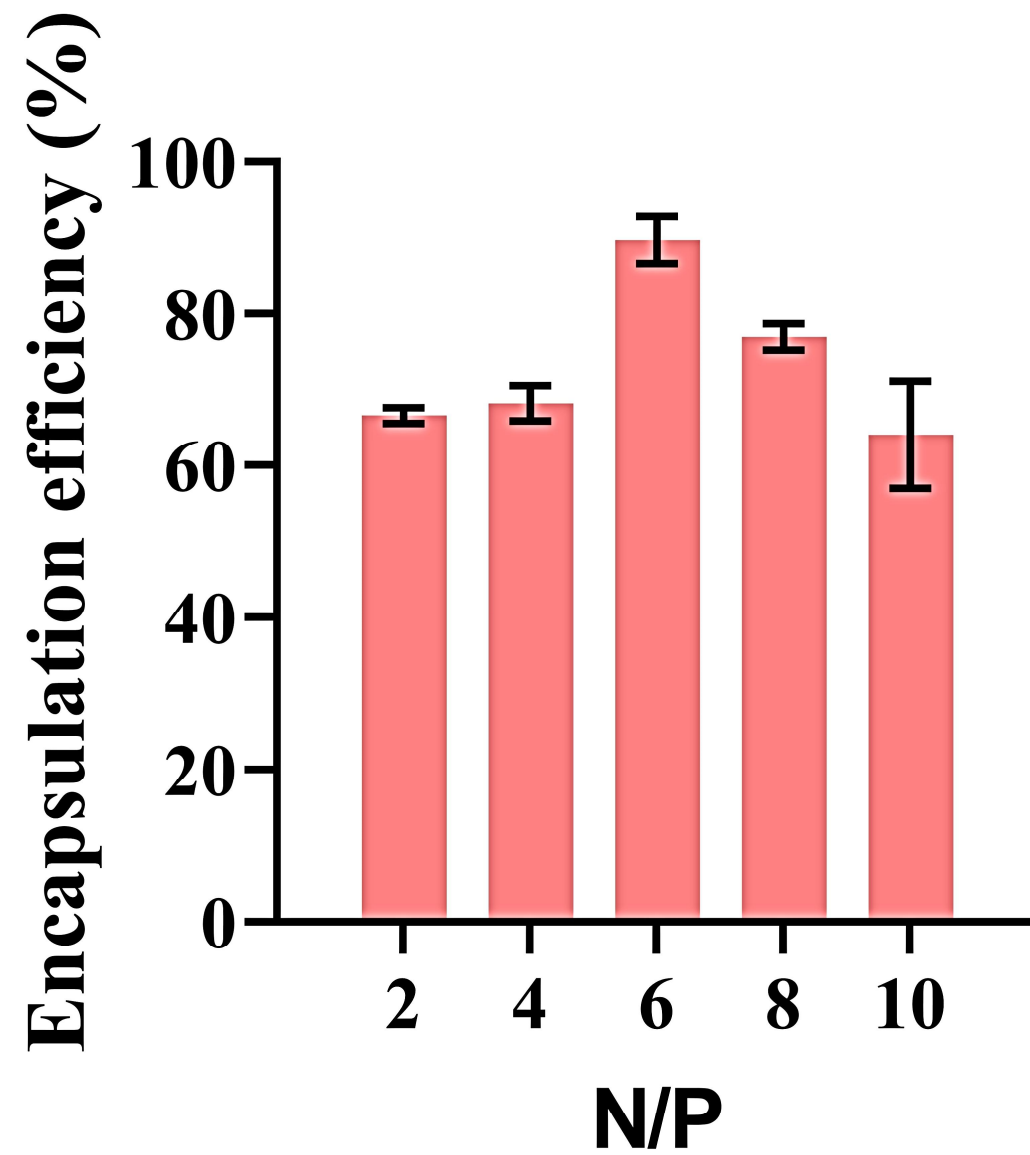

Supplement: d6nj00177g6.pdf [file d6nj00177g6.pdf]

(a)

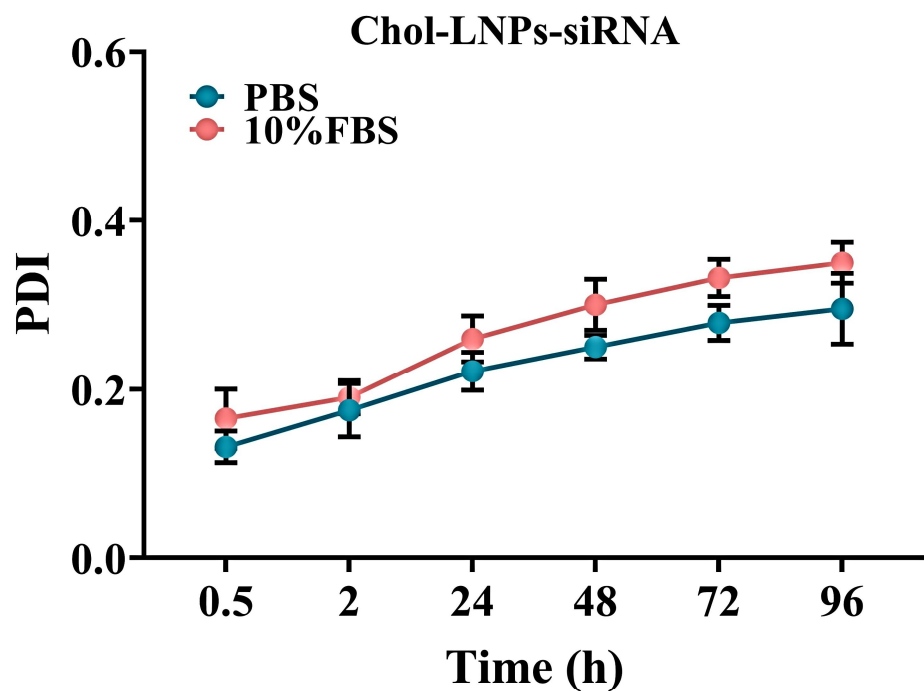

(b)

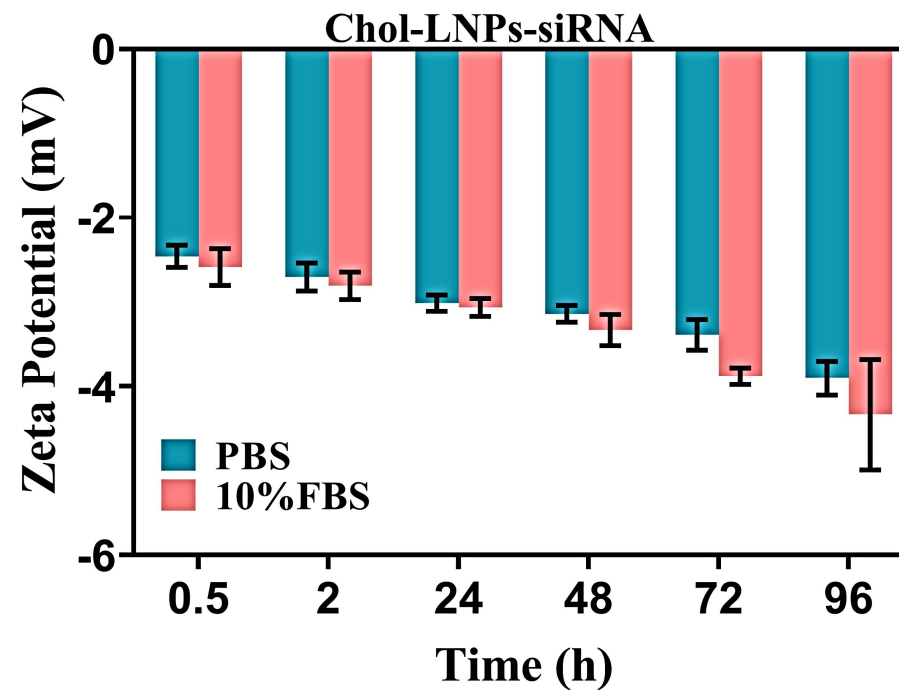

(c)

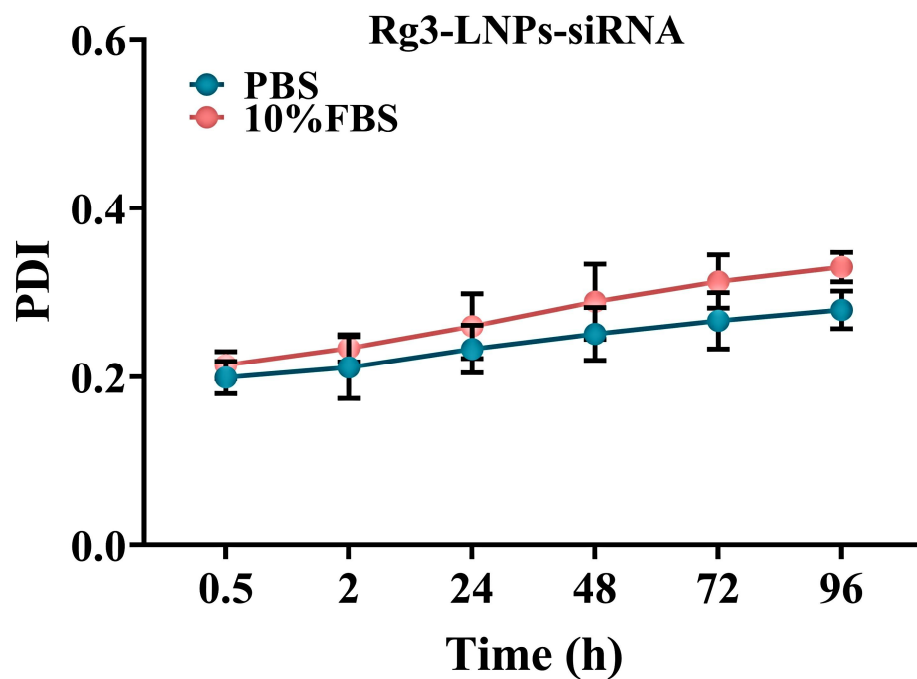

(d)

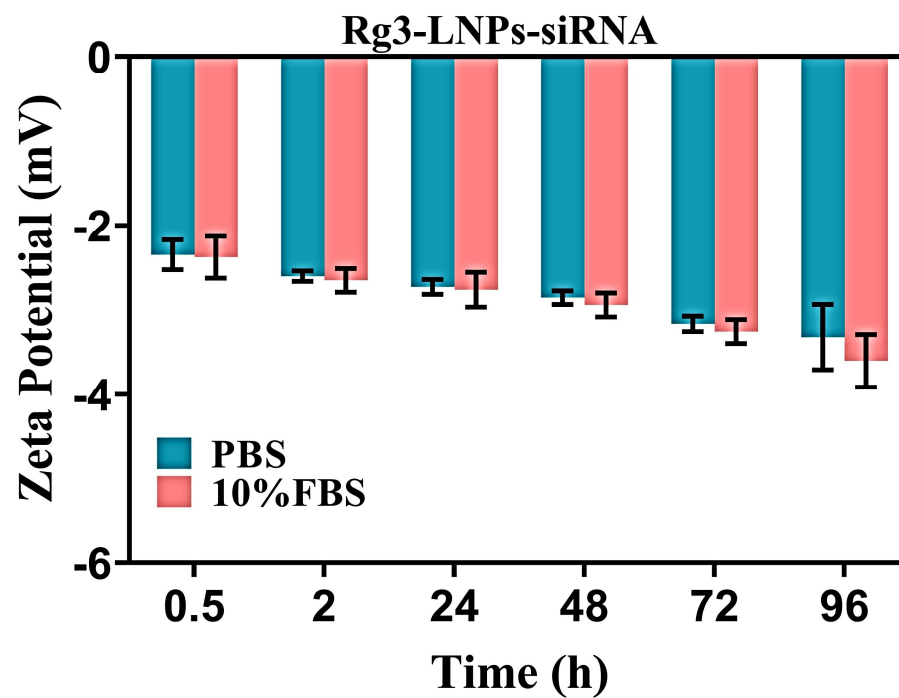

Supplement: d6nj00177g8.pdf [file d6nj00177g8.pdf]

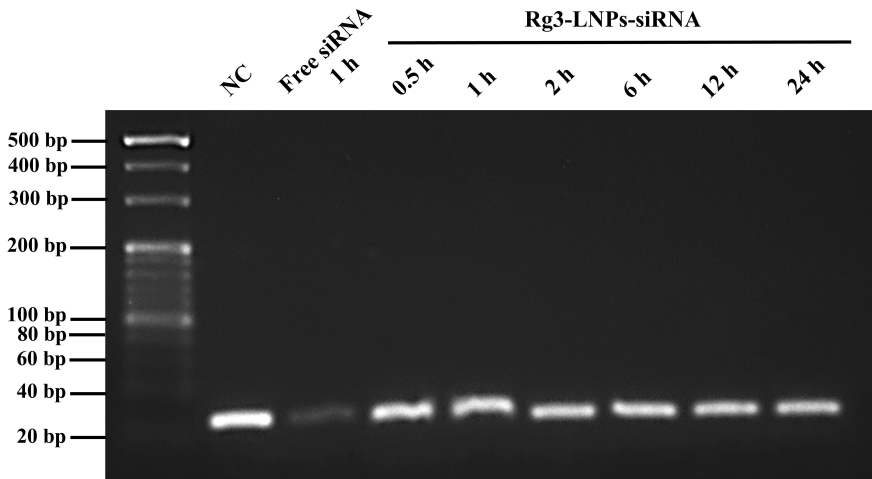

Supplement: d6nj00177g9.pdf [file d6nj00177g9.pdf]
